# Supplementary material
Source: publisher site journal article supplement (https://www.dovepress.com/article/370963)

**Suppl_Table 1. The detail of PCR primers and UEP sequence for *ZBTB20*** variants

| SNPs | First Primer(5'-3') | Second Primer (5'-3') | UEP_DIR | | | UEP SEQ (5'-3') |
| --- | --- | --- | --- | --- | --- | --- |
| rs10934270 | ACGTTGGATGGAAATTAACCAGATCGGCGG | ACGTTGGATGTGCCATCACTGTATGTGTGC | | F | GCATTTGATGTATATATTTCACA | |
| rs9288999 | ACGTTGGATGTGAATCTAGTCCGTGGCTTC | ACGTTGGATGATTGCTGGGTAGTAAAAAG | | R | atgtTAGTGAAAATGCTACAACAC | |
| rs9841504 | ACGTTGGATGACATTTTGCCCGTACCTCTC | ACGTTGGATGGAATCTCACTGTTAAGGAGC | | F | TCCCTTTTTCCCTATATATTTTTA | |
| rs73230612 | ACGTTGGATGATGGTAACGAAAGGCAAGCA | ACGTTGGATGCTAGGCCATGACCATGTTGT | | R | CAAGCAAATATGAAAAAGCAATGA | |

SNP, Single nucleotide polymorphism; UEP, Unextended mini sequencing primer; DIR, direction; SEQ, sequence.

**Suppl_Figure 1. The violin plot for the association of rs10934270 and rs73230612 with the mRNA expression of *ZBTB20* in whole blood.**


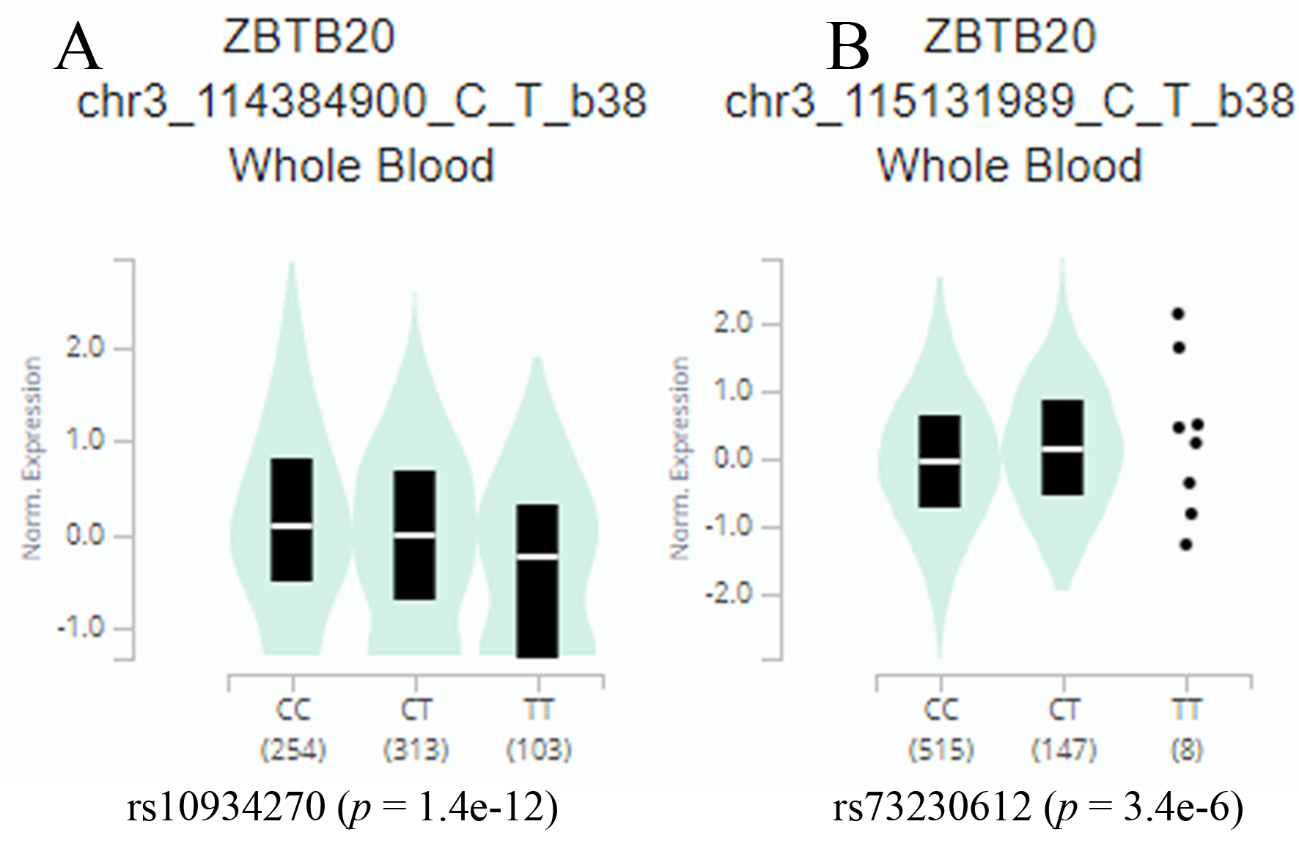

Supplement: Supplementary file 1 [file get_supplementary_file.php]
